# Supplementary material for: Similar Responses of Relatively Salt-Tolerant Plants to Na and K during Chloride Salinity: Comparison of Growth, Water Content and Ion Accumulation
Source: MDPI journal article supplement (doi:10.3390/life12101577), 2022-10-11
Supplement: s1 [file s1]

Supplement

**Similar responses to Na and K during chloride salinity: comparison of growth, water content and ion accumulation of several model plants with relatively high salt tolerance**

**Figure S1.** Typical *Plantago maritima* plants 6 weeks after the final treatment with NaCl (A) and KCl (B).

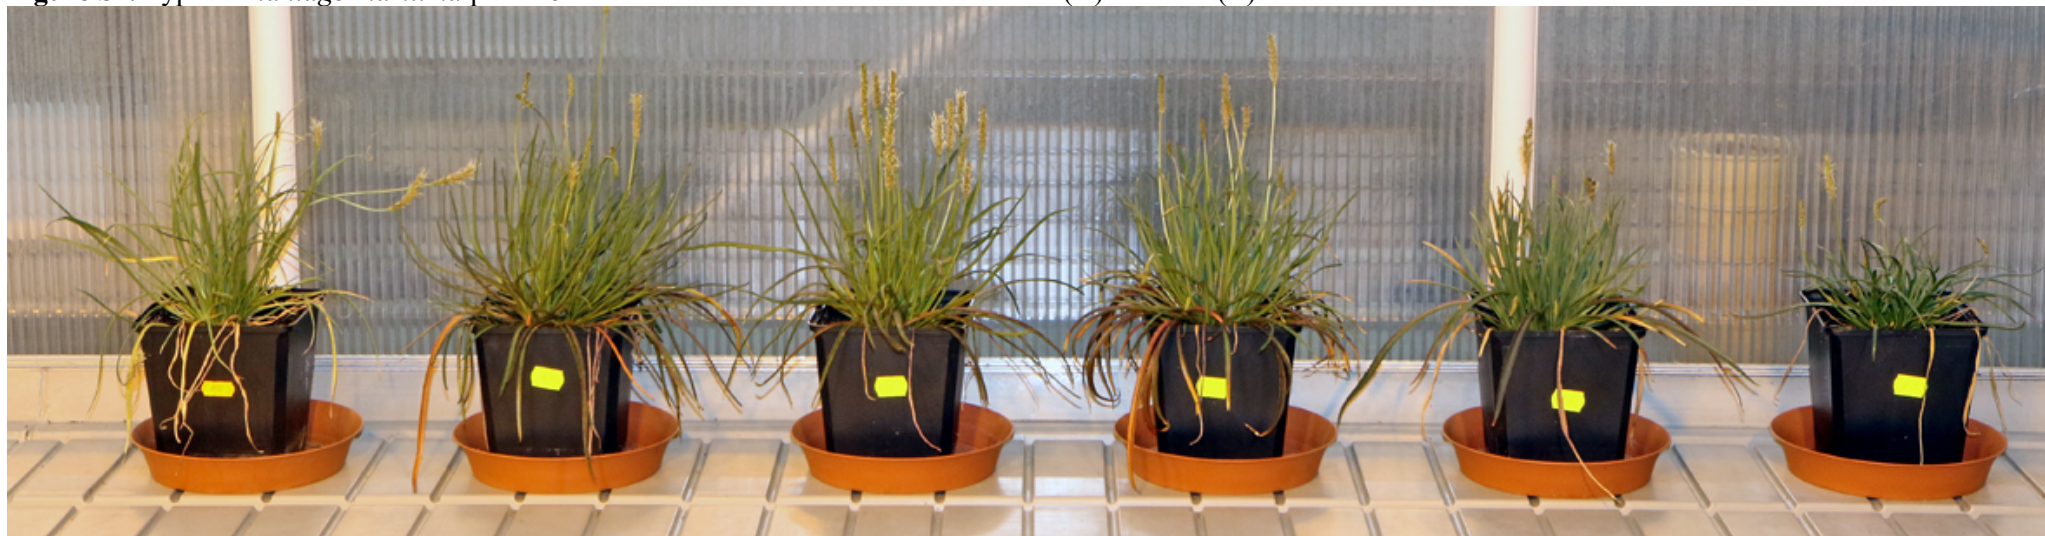

A, from left to right: control, 22 mmol L<sup>-1</sup> NaCl, 44 mmol L<sup>-1</sup> NaCl, 88 mmol L<sup>-1</sup> NaCl, 217 mmol L<sup>-1</sup> NaCl, 434 mmol L<sup>-1</sup> NaCl.

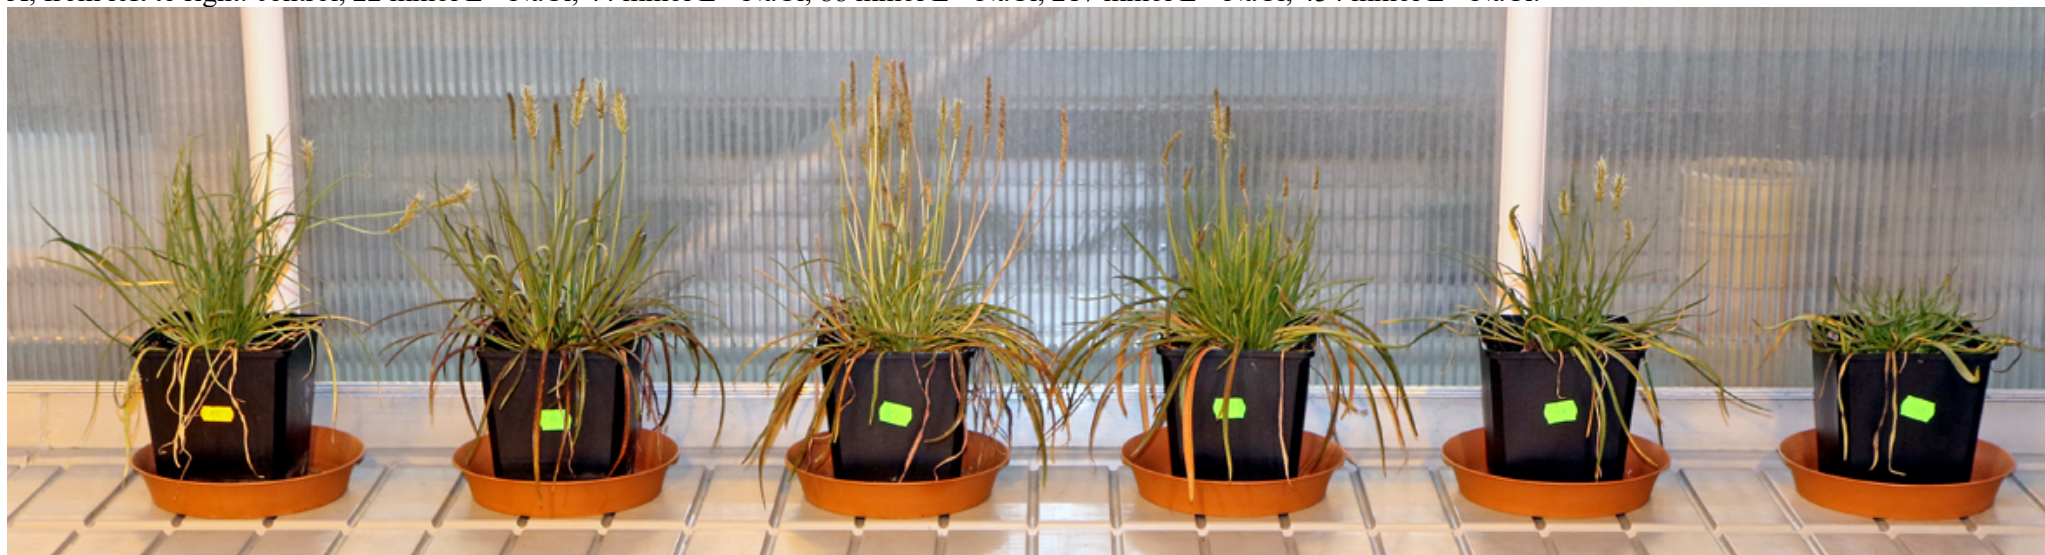

B, from left to right: control, 22 mmol L<sup>-1</sup> KCl, 44 mmol L<sup>-1</sup> KCl, 88 mmol L<sup>-1</sup> KCl, 217 mmol L<sup>-1</sup> KCl, 434 mmol L<sup>-1</sup> KCl.



**Figure S2.** Typical *Beta vulgaris* subsp. *vulgaris* var. *cicla* plants 4 weeks after the final treatment with NaCl (A) and KCl (B).

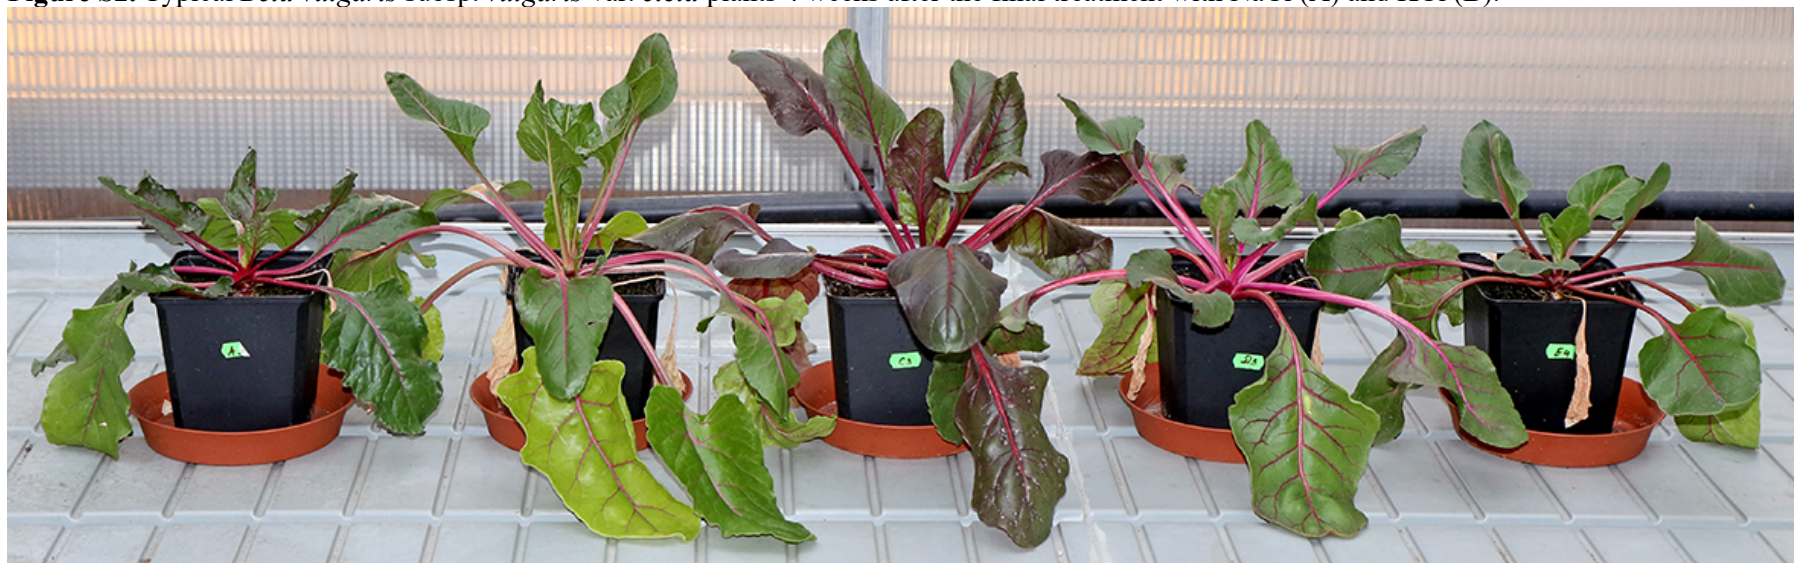

A, from left to right: control, 44 mmol L<sup>-1</sup> NaCl, 88 mmol L<sup>-1</sup> NaCl, 217 mmol L<sup>-1</sup> NaCl, 434 mmol L<sup>-1</sup> NaCl.

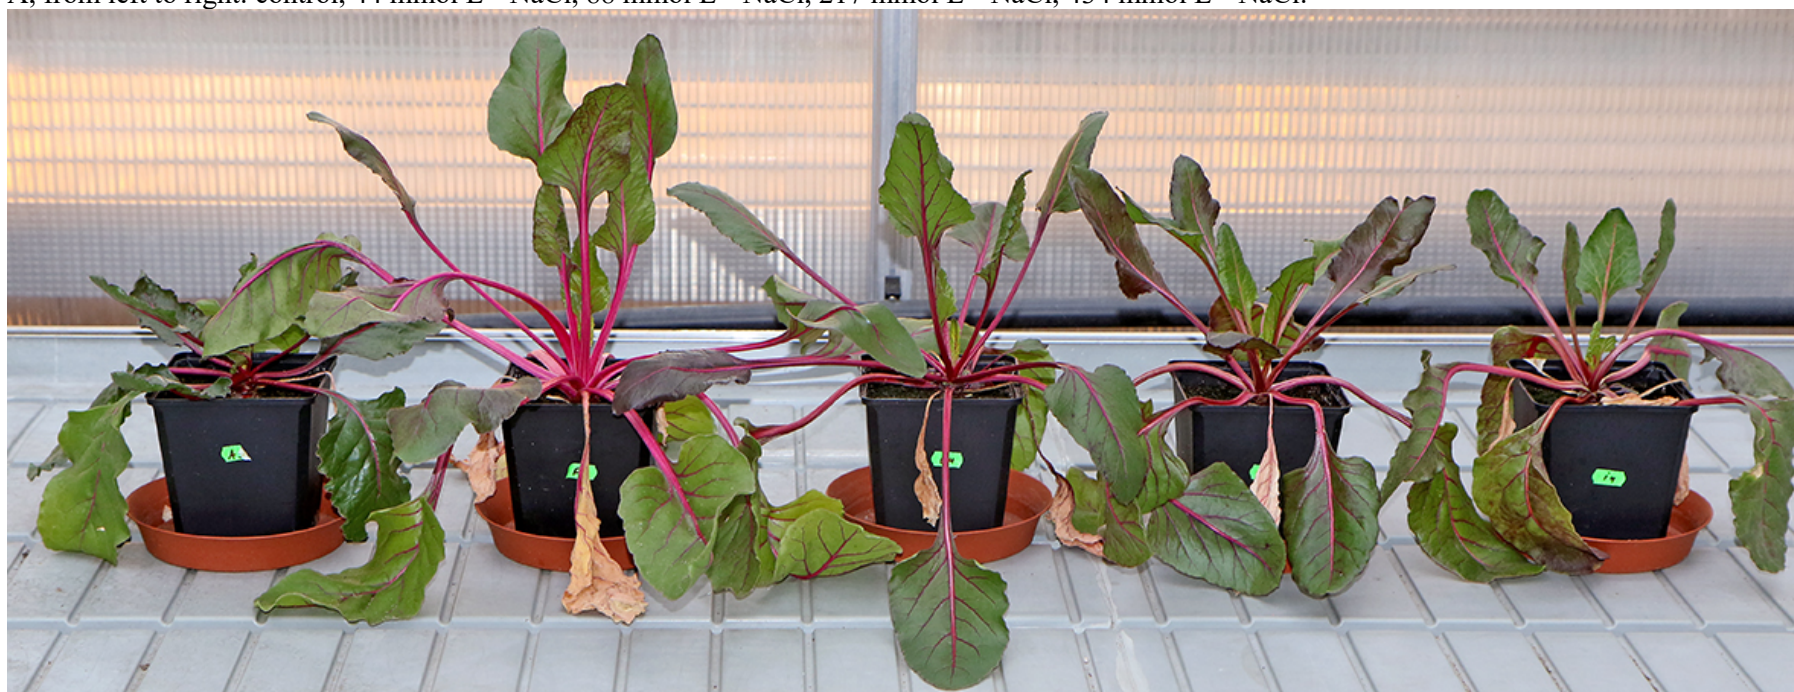

B, from left to right: control, 44 mmol L<sup>-1</sup> KCl, 88 mmol L<sup>-1</sup> KCl, 217 mmol L<sup>-1</sup> KCl, 434 mmol L<sup>-1</sup> KCl.



**Figure S3.** Typical *Beta vulgaris* subsp. *maritima* plants 5 weeks after the final treatment with NaCl and KCl.

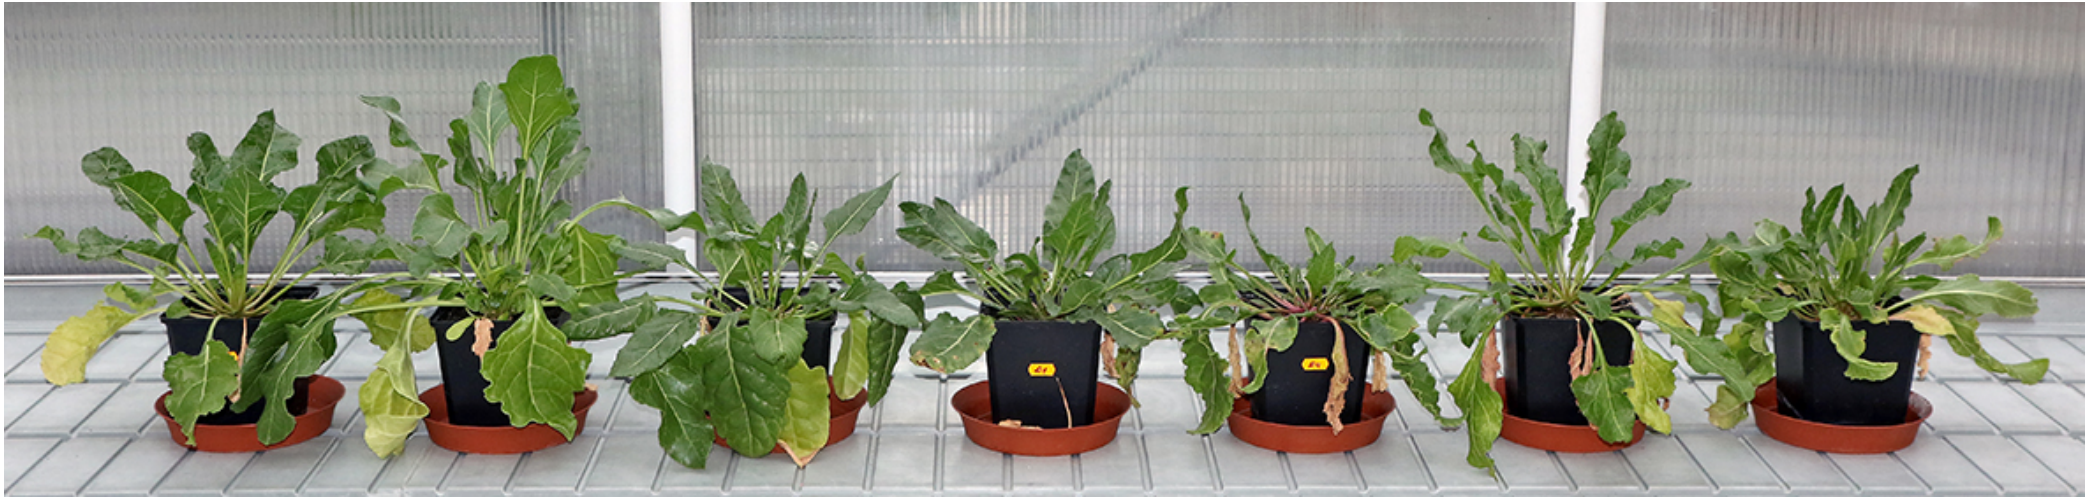

From left to right: control, 44 mmol L<sup>-1</sup> NaCl, 88 mmol L<sup>-1</sup> NaCl, 217 mmol L<sup>-1</sup> NaCl, 434 mmol L<sup>-1</sup> NaCl, 44 mmol L<sup>-1</sup> KCl, 434 mmol L<sup>-1</sup> KCl.

**Figure S4.** Typical *Cochlearia officinalis* plants 3 weeks after the final treatment with NaCl (A) and KCl (B).

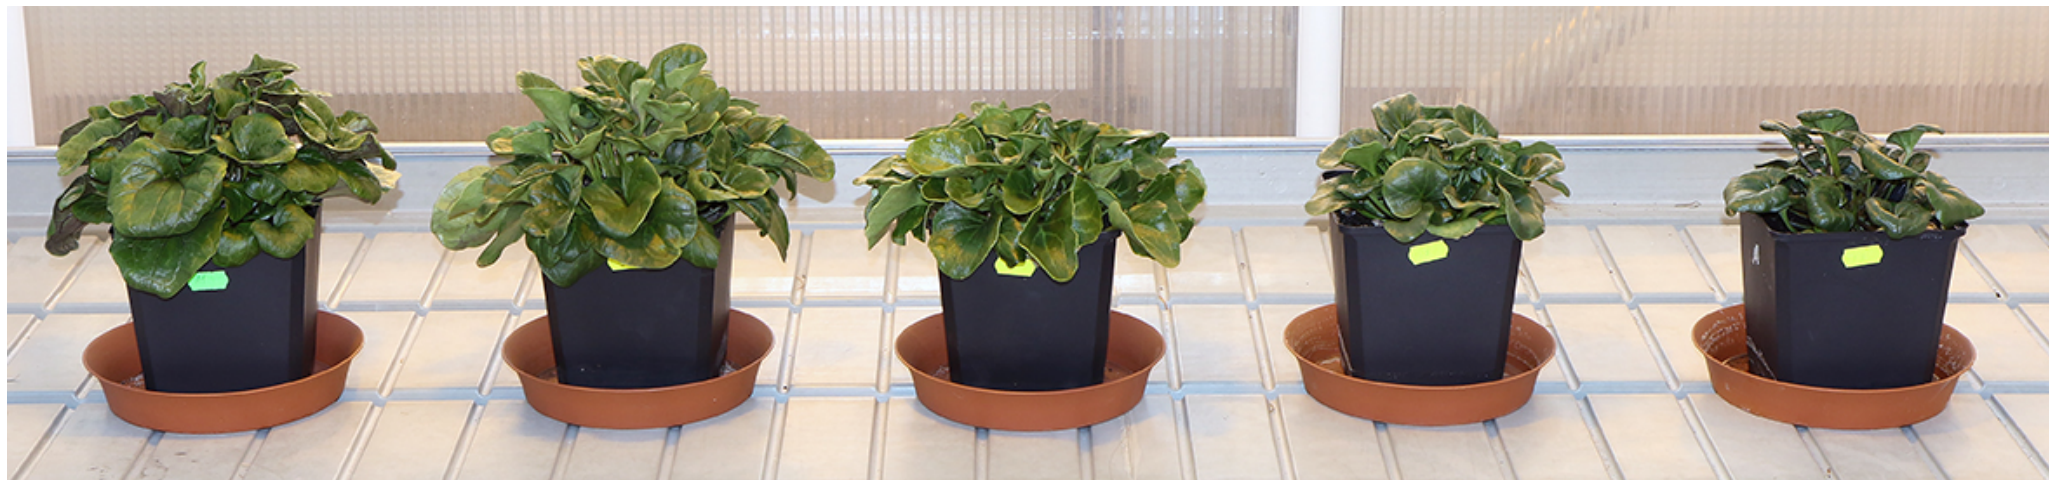

A, from left to right: control, 44 mmol L<sup>-1</sup> NaCl, 88 mmol L<sup>-1</sup> NaCl, 217 mmol L<sup>-1</sup> NaCl, 434 mmol L<sup>-1</sup> NaCl.

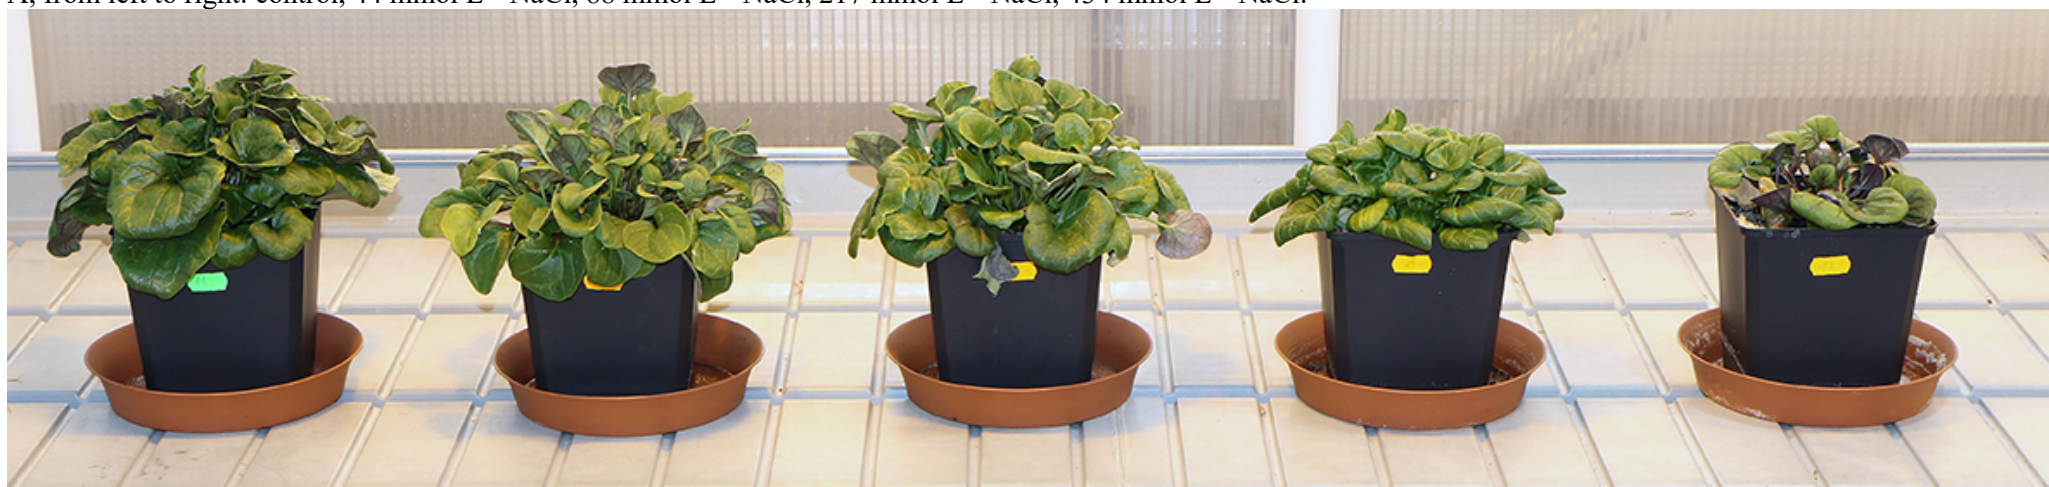

B, from left to right: control, 44 mmol L<sup>-1</sup> KCl, 88 mmol L<sup>-1</sup> KCl, 217 mmol L<sup>-1</sup> KCl, 434 mmol L<sup>-1</sup> KCl.

**Table S1.** Effect of NaCl and KCl treatment on morphological parameters of *Plantago maritima* plants. Data are means from 5 replicates  $\pm$  SE.

| Parameter                         | Control         | NaCl (mmol L <sup>-1</sup> ) |                 |                 |                 |                 | KCl (mmol L <sup>-1</sup> ) |                 |                 |                 |                 |
|-----------------------------------|-----------------|------------------------------|-----------------|-----------------|-----------------|-----------------|-----------------------------|-----------------|-----------------|-----------------|-----------------|
|                                   |                 | 22                           | 44              | 88              | 217             | 434             | 22                          | 44              | 88              | 217             | 434             |
| Senescent leaves ( <i>n</i> )     | 43 $\pm$ 17     | 33 $\pm$ 10                  | 22 $\pm$ 2      | 35 $\pm$ 6      | 28 $\pm$ 7      | 28 $\pm$ 6      | 23 $\pm$ 3                  | 30 $\pm$ 5      | 27 $\pm$ 2      | 33 $\pm$ 8      | 24 $\pm$ 2      |
| Old leaves ( <i>n</i> )           | 41 $\pm$ 12     | 42 $\pm$ 5                   | 29 $\pm$ 3      | 43 $\pm$ 13     | 40 $\pm$ 9      | 38 $\pm$ 4      | 42 $\pm$ 8                  | 33 $\pm$ 4      | 49 $\pm$ 13     | 33 $\pm$ 2      | 8 $\pm$ 3       |
| Middle leaves ( <i>n</i> )        | 39 $\pm$ 5      | 72 $\pm$ 17                  | 57 $\pm$ 9      | 43 $\pm$ 12     | 53 $\pm$ 7      | 60 $\pm$ 9      | 81 $\pm$ 10                 | 56 $\pm$ 13     | 97 $\pm$ 20     | 60 $\pm$ 11     | 24 $\pm$ 7      |
| Young leaves ( <i>n</i> )         | 40 $\pm$ 9      | 70 $\pm$ 9                   | 108 $\pm$ 25    | 61 $\pm$ 18     | 94 $\pm$ 21     | 38 $\pm$ 6      | 86 $\pm$ 14                 | 64 $\pm$ 12     | 105 $\pm$ 31    | 33 $\pm$ 5      | 69 $\pm$ 14     |
| Leaves total ( <i>n</i> )         | 164 $\pm$ 29    | 216 $\pm$ 23                 | 216 $\pm$ 34    | 182 $\pm$ 31    | 215 $\pm$ 25    | 164 $\pm$ 14    | 232 $\pm$ 21                | 184 $\pm$ 21    | 278 $\pm$ 45    | 158 $\pm$ 21    | 126 $\pm$ 22    |
| Flower stalks ( <i>n</i> )        | 22 $\pm$ 2      | 28 $\pm$ 3                   | 29 $\pm$ 4      | 32 $\pm$ 5      | 26 $\pm$ 3      | 15 $\pm$ 2      | 21 $\pm$ 5                  | 30 $\pm$ 6      | 24 $\pm$ 6      | 23 $\pm$ 5      | 4 $\pm$ 2       |
| Total length of flower stalks (m) | 4.9 $\pm$ 0.9   | 6.0 $\pm$ 0.9                | 6.0 $\pm$ 0.6   | 6.0 $\pm$ 0.9   | 3.4 $\pm$ 0.5   | 1.5 $\pm$ 0.4   | 5.5 $\pm$ 2.0               | 6.8 $\pm$ 1.1   | 4.4 $\pm$ 1.2   | 3.1 $\pm$ 0.7   | 0.5 $\pm$ 0.2   |
| DM of senescent leaves (g)        | 1.9 $\pm$ 0.5   | 1.7 $\pm$ 0.2                | 1.3 $\pm$ 0.1   | 1.6 $\pm$ 0.4   | 1.1 $\pm$ 0.2   | 0.9 $\pm$ 0.2   | 1.5 $\pm$ 0.5               | 2.0 $\pm$ 0.3   | 1.1 $\pm$ 0.2   | 1.5 $\pm$ 0.4   | 1.6 $\pm$ 0.2   |
| DM of old leaves (g)              | 2.3 $\pm$ 0.5   | 2.7 $\pm$ 0.1                | 2.2 $\pm$ 0.2   | 2.6 $\pm$ 0.5   | 1.7 $\pm$ 0.3   | 0.9 $\pm$ 0.2   | 3.1 $\pm$ 0.7               | 2.4 $\pm$ 0.3   | 2.2 $\pm$ 0.5   | 1.7 $\pm$ 0.2   | 0.6 $\pm$ 0.2   |
| DM of middle leaves (g)           | 2.4 $\pm$ 0.2   | 3.8 $\pm$ 0.9                | 3.0 $\pm$ 0.6   | 2.0 $\pm$ 0.6   | 2.0 $\pm$ 0.4   | 1.4 $\pm$ 0.2   | 4.5 $\pm$ 0.8               | 3.6 $\pm$ 1.3   | 4.4 $\pm$ 0.5   | 2.7 $\pm$ 0.6   | 1.0 $\pm$ 0.2   |
| DM of young leaves (g)            | 0.74 $\pm$ 0.17 | 1.36 $\pm$ 0.16              | 2.22 $\pm$ 0.45 | 0.76 $\pm$ 0.14 | 1.01 $\pm$ 0.29 | 0.25 $\pm$ 0.06 | 1.84 $\pm$ 0.40             | 1.06 $\pm$ 0.18 | 1.64 $\pm$ 0.43 | 0.31 $\pm$ 0.03 | 0.94 $\pm$ 0.28 |
| DM of leaves total (g)            | 7.3 $\pm$ 0.8   | 9.5 $\pm$ 1.0                | 8.8 $\pm$ 1.1   | 7.0 $\pm$ 1.1   | 5.8 $\pm$ 0.7   | 3.4 $\pm$ 0.4   | 10.9 $\pm$ 1.7              | 9.1 $\pm$ 1.7   | 9.3 $\pm$ 0.6   | 6.1 $\pm$ 1.0   | 4.1 $\pm$ 0.7   |
| DM of flower stalks (g)           | 1.45 $\pm$ 0.39 | 1.77 $\pm$ 0.24              | 2.00 $\pm$ 0.22 | 1.68 $\pm$ 0.17 | 0.78 $\pm$ 0.13 | 0.37 $\pm$ 0.11 | 1.48 $\pm$ 0.39             | 2.10 $\pm$ 0.26 | 1.21 $\pm$ 0.31 | 0.84 $\pm$ 0.17 | 0.12 $\pm$ 0.05 |
| DM of flowers (g)                 | 1.10 $\pm$ 0.28 | 1.27 $\pm$ 0.19              | 1.84 $\pm$ 0.20 | 1.70 $\pm$ 0.25 | 0.77 $\pm$ 0.11 | 0.55 $\pm$ 0.18 | 1.17 $\pm$ 0.42             | 2.11 $\pm$ 0.37 | 0.90 $\pm$ 0.24 | 1.12 $\pm$ 0.22 | 0.17 $\pm$ 0.08 |
| DM of roots (g)                   | 2.4 $\pm$ 0.3   | 3.6 $\pm$ 0.4                | 4.4 $\pm$ 1.3   | 2.4 $\pm$ 0.6   | 2.7 $\pm$ 0.3   | 1.6 $\pm$ 0.2   | 5.8 $\pm$ 0.4               | 4.4 $\pm$ 0.9   | 5.7 $\pm$ 0.5   | 3.1 $\pm$ 0.5   | 1.7 $\pm$ 0.4   |



**Table S2.** Effect of NaCl and KCl treatment on morphological parameters of *Beta vulgaris* subsp. *vulgaris* var. *cicla* plants. Data are means from 5 replicates  $\pm$  SE.

| Parameter                         | Control         | NaCl (mmol L <sup>-1</sup> ) |                 |                 |                 | KCl (mmol L <sup>-1</sup> ) |                 |                 |                 |
|-----------------------------------|-----------------|------------------------------|-----------------|-----------------|-----------------|-----------------------------|-----------------|-----------------|-----------------|
|                                   |                 | 44                           | 87              | 217             | 434             | 44                          | 87              | 217             | 434             |
| Senescent leaves ( <i>n</i> )     | 3.5 $\pm$ 0.3   | 2.8 $\pm$ 0.3                | 3.6 $\pm$ 0.7   | 3.0 $\pm$ 0.5   | 4.0 $\pm$ 0.6   | 3.7 $\pm$ 0.9               | 3.2 $\pm$ 0.2   | 2.6 $\pm$ 0.4   | 3.4 $\pm$ 0.3   |
| Old leaves ( <i>n</i> )           | 3.8 $\pm$ 0.5   | 4.5 $\pm$ 0.3                | 3.8 $\pm$ 0.2   | 3.8 $\pm$ 0.5   | 3.2 $\pm$ 0.2   | 4.0 $\pm$ 0.0               | 4.0 $\pm$ 0.0   | 4.0 $\pm$ 0.3   | 3.2 $\pm$ 0.4   |
| Middle leaves ( <i>n</i> )        | 5.0 $\pm$ 1.1   | 5.5 $\pm$ 0.5                | 5.8 $\pm$ 1.2   | 4.5 $\pm$ 0.3   | 3.4 $\pm$ 0.4   | 5.0 $\pm$ 0.6               | 6.4 $\pm$ 0.3   | 6.4 $\pm$ 0.6   | 2.6 $\pm$ 0.4   |
| Young leaves ( <i>n</i> )         | 6.3 $\pm$ 0.3   | 9.0 $\pm$ 1.4                | 8.4 $\pm$ 1.6   | 7.8 $\pm$ 1.1   | 8.6 $\pm$ 1.6   | 8.0 $\pm$ 1.2               | 7.4 $\pm$ 0.8   | 8.2 $\pm$ 0.9   | 7.0 $\pm$ 0.6   |
| Leaves total ( <i>n</i> )         | 18.5 $\pm$ 1.7  | 21.8 $\pm$ 1.7               | 21.6 $\pm$ 2.8  | 19.0 $\pm$ 2.0  | 19.2 $\pm$ 1.5  | 20.7 $\pm$ 0.9              | 21.0 $\pm$ 0.9  | 21.2 $\pm$ 1.2  | 16.2 $\pm$ 0.9  |
| DM of senescent leaf petioles (g) | 0.22 $\pm$ 0.02 | 0.31 $\pm$ 0.06              | 0.47 $\pm$ 0.18 | 0.28 $\pm$ 0.08 | 0.36 $\pm$ 0.11 | 0.55 $\pm$ 0.16             | 0.33 $\pm$ 0.06 | 0.32 $\pm$ 0.04 | 0.37 $\pm$ 0.06 |
| DM of senescent leaf blades (g)   | 0.61 $\pm$ 0.06 | 1.00 $\pm$ 0.17              | 1.24 $\pm$ 0.21 | 0.74 $\pm$ 0.22 | 1.18 $\pm$ 0.30 | 1.99 $\pm$ 0.65             | 1.20 $\pm$ 0.16 | 1.32 $\pm$ 0.22 | 1.26 $\pm$ 0.23 |
| DM of old leaf petioles (g)       | 1.43 $\pm$ 0.39 | 1.95 $\pm$ 0.27              | 1.66 $\pm$ 0.29 | 1.07 $\pm$ 0.12 | 0.97 $\pm$ 0.20 | 1.83 $\pm$ 0.60             | 1.50 $\pm$ 0.32 | 1.48 $\pm$ 0.31 | 0.84 $\pm$ 0.12 |
| DM of old leaf blades (g)         | 2.2 $\pm$ 0.4   | 4.3 $\pm$ 0.4                | 2.8 $\pm$ 0.3   | 3.3 $\pm$ 0.6   | 2.8 $\pm$ 0.3   | 2.4 $\pm$ 0.4               | 3.0 $\pm$ 0.6   | 4.6 $\pm$ 0.7   | 3.7 $\pm$ 0.5   |
| DM of middle leaf petioles (g)    | 1.48 $\pm$ 0.29 | 1.82 $\pm$ 0.03              | 1.68 $\pm$ 0.23 | 1.18 $\pm$ 0.20 | 0.81 $\pm$ 0.09 | 2.17 $\pm$ 0.73             | 1.81 $\pm$ 0.20 | 2.06 $\pm$ 0.34 | 0.57 $\pm$ 0.12 |
| DM of middle leaf blades (g)      | 1.58 $\pm$ 0.10 | 2.25 $\pm$ 0.10              | 1.96 $\pm$ 0.27 | 1.90 $\pm$ 0.26 | 1.51 $\pm$ 0.17 | 1.79 $\pm$ 0.26             | 2.18 $\pm$ 0.26 | 2.38 $\pm$ 0.28 | 1.50 $\pm$ 0.18 |
| DM of young leaf blades (g)       | 0.74 $\pm$ 0.25 | 0.70 $\pm$ 0.23              | 0.64 $\pm$ 0.06 | 0.55 $\pm$ 0.08 | 0.52 $\pm$ 0.08 | 0.79 $\pm$ 0.19             | 0.65 $\pm$ 0.13 | 0.84 $\pm$ 0.10 | 0.43 $\pm$ 0.06 |
| DM of young leaf petioles (g)     | 0.87 $\pm$ 0.11 | 1.22 $\pm$ 0.38              | 0.97 $\pm$ 0.09 | 0.93 $\pm$ 0.18 | 0.96 $\pm$ 0.14 | 0.94 $\pm$ 0.10             | 1.00 $\pm$ 0.11 | 0.96 $\pm$ 0.12 | 0.86 $\pm$ 0.07 |
| DM of leaf petioles total (g)     | 3.9 $\pm$ 0.7   | 4.8 $\pm$ 0.4                | 4.4 $\pm$ 0.7   | 3.1 $\pm$ 0.1   | 2.7 $\pm$ 0.4   | 5.4 $\pm$ 1.4               | 4.3 $\pm$ 0.5   | 4.7 $\pm$ 0.7   | 2.2 $\pm$ 0.3   |
| DM of leaf blades total (g)       | 5.2 $\pm$ 0.5   | 8.7 $\pm$ 0.7                | 6.9 $\pm$ 0.7   | 6.9 $\pm$ 1.0   | 6.4 $\pm$ 0.6   | 7.1 $\pm$ 1.0               | 7.4 $\pm$ 0.7   | 9.2 $\pm$ 1.1   | 7.3 $\pm$ 0.6   |
| DM of leaves total (g)            | 9.1 $\pm$ 0.9   | 13.5 $\pm$ 1.1               | 11.4 $\pm$ 1.1  | 9.9 $\pm$ 1.0   | 9.1 $\pm$ 0.9   | 12.5 $\pm$ 2.2              | 11.7 $\pm$ 1.2  | 13.9 $\pm$ 1.7  | 9.5 $\pm$ 0.7   |
| DM of roots (g)                   | 5.5 $\pm$ 1.4   | 6.5 $\pm$ 1.0                | 5.5 $\pm$ 0.7   | 3.9 $\pm$ 0.8   | 3.1 $\pm$ 0.3   | 5.0 $\pm$ 1.2               | 6.0 $\pm$ 0.8   | 4.1 $\pm$ 0.3   | 2.9 $\pm$ 0.3   |

**Table S3.** Effect of NaCl and KCl treatment on morphological parameters of *Beta vulgaris* subsp. *maritima* plants. Data are means from 5 replicates  $\pm$  SE.

| Parameter                         | Control         | NaCl (mmol L <sup>-1</sup> ) |                 |                 |                 | KCl (mmol L <sup>-1</sup> ) |                 |
|-----------------------------------|-----------------|------------------------------|-----------------|-----------------|-----------------|-----------------------------|-----------------|
|                                   |                 | 44                           | 87              | 217             | 434             | 44                          | 434             |
| Senescent leaves ( <i>n</i> )     | 4.3 $\pm$ 0.5   | 3.8 $\pm$ 0.9                | 3.8 $\pm$ 0.5   | 4.5 $\pm$ 0.9   | 3.6 $\pm$ 1.1   | 4.5 $\pm$ 0.5               | 4.6 $\pm$ 1.0   |
| Old leaves ( <i>n</i> )           | 7.8 $\pm$ 0.8   | 10.0 $\pm$ 1.8               | 7.5 $\pm$ 0.9   | 6.5 $\pm$ 0.9   | 5.2 $\pm$ 0.6   | 6.8 $\pm$ 0.5               | 4.6 $\pm$ 0.6   |
| Middle leaves ( <i>n</i> )        | 8.5 $\pm$ 1.4   | 8.5 $\pm$ 1.2                | 9.8 $\pm$ 1.4   | 9.3 $\pm$ 1.8   | 7.0 $\pm$ 1.0   | 7.8 $\pm$ 0.3               | 8.2 $\pm$ 1.2   |
| Young leaves ( <i>n</i> )         | 4.8 $\pm$ 0.3   | 7.5 $\pm$ 0.9                | 8.3 $\pm$ 0.9   | 12.3 $\pm$ 3.1  | 10.0 $\pm$ 2.7  | 7.5 $\pm$ 1.0               | 7.8 $\pm$ 1.7   |
| Small leaves ( <i>n</i> )         | 18.3 $\pm$ 1.8  | 26.8 $\pm$ 3.5               | 32.3 $\pm$ 4.7  | 39.3 $\pm$ 4.9  | 10.6 $\pm$ 2.9  | 16.3 $\pm$ 4.0              | 16.0 $\pm$ 5.6  |
| Leaves total ( <i>n</i> )         | 44 $\pm$ 1      | 57 $\pm$ 3                   | 62 $\pm$ 7      | 72 $\pm$ 9      | 45 $\pm$ 6      | 43 $\pm$ 4                  | 41 $\pm$ 9      |
| DM of senescent leaf petioles (g) | 0.19 $\pm$ 0.07 | 0.36 $\pm$ 0.10              | 0.17 $\pm$ 0.05 | 0.33 $\pm$ 0.12 | 0.40 $\pm$ 0.10 | 0.39 $\pm$ 0.14             | 0.33 $\pm$ 0.08 |
| DM of senescent leaf blades (g)   | 0.65 $\pm$ 0.18 | 1.45 $\pm$ 0.34              | 1.29 $\pm$ 0.51 | 1.85 $\pm$ 0.53 | 1.84 $\pm$ 0.47 | 2.32 $\pm$ 1.12             | 1.53 $\pm$ 0.25 |
| DM of old leaf petioles (g)       | 1.21 $\pm$ 0.32 | 2.12 $\pm$ 0.24              | 0.98 $\pm$ 0.11 | 0.71 $\pm$ 0.09 | 0.75 $\pm$ 0.07 | 1.38 $\pm$ 0.31             | 0.64 $\pm$ 0.11 |
| DM of old leaf blades (g)         | 2.5 $\pm$ 0.2   | 4.5 $\pm$ 0.4                | 3.4 $\pm$ 0.4   | 2.9 $\pm$ 0.3   | 2.9 $\pm$ 0.4   | 3.8 $\pm$ 0.7               | 3.5 $\pm$ 0.8   |
| DM of middle leaf petioles (g)    | 1.37 $\pm$ 0.15 | 1.32 $\pm$ 0.15              | 0.95 $\pm$ 0.06 | 0.69 $\pm$ 0.08 | 0.61 $\pm$ 0.13 | 1.36 $\pm$ 0.18             | 0.56 $\pm$ 0.08 |
| DM of middle leaf blades (g)      | 2.17 $\pm$ 0.37 | 2.14 $\pm$ 0.20              | 2.23 $\pm$ 0.16 | 1.68 $\pm$ 0.16 | 1.46 $\pm$ 0.15 | 2.18 $\pm$ 0.15             | 1.86 $\pm$ 0.29 |
| DM of young leaf petioles (g)     | 0.19 $\pm$ 0.04 | 0.22 $\pm$ 0.04              | 0.18 $\pm$ 0.06 | 0.32 $\pm$ 0.07 | 0.22 $\pm$ 0.04 | 0.45 $\pm$ 0.10             | 0.20 $\pm$ 0.06 |
| DM of young leaf blades (g)       | 0.48 $\pm$ 0.09 | 0.57 $\pm$ 0.10              | 0.55 $\pm$ 0.13 | 0.74 $\pm$ 0.16 | 0.59 $\pm$ 0.06 | 0.76 $\pm$ 0.12             | 0.54 $\pm$ 0.14 |
| DM of small leaf petioles (g)     | 0.17 $\pm$ 0.04 | 0.41 $\pm$ 0.12              | 0.38 $\pm$ 0.15 | 0.44 $\pm$ 0.12 | 0.19 $\pm$ 0.06 | 0.17 $\pm$ 0.05             | 0.18 $\pm$ 0.06 |
| DM of small leaf blades (g)       | 0.32 $\pm$ 0.04 | 0.85 $\pm$ 0.25              | 1.10 $\pm$ 0.43 | 1.03 $\pm$ 0.22 | 0.48 $\pm$ 0.10 | 0.34 $\pm$ 0.10             | 0.59 $\pm$ 0.19 |
| DM of leaf petioles total (g)     | 3.1 $\pm$ 0.4   | 4.4 $\pm$ 0.3                | 2.7 $\pm$ 0.3   | 2.5 $\pm$ 0.2   | 2.2 $\pm$ 0.2   | 3.7 $\pm$ 0.4               | 2.6 $\pm$ 0.3   |
| DM of leaf blades total (g)       | 6.1 $\pm$ 0.4   | 9.5 $\pm$ 0.4                | 8.6 $\pm$ 0.6   | 7.7 $\pm$ 0.5   | 6.9 $\pm$ 0.9   | 8.3 $\pm$ 0.4               | 7.9 $\pm$ 1.2   |
| DM of leaves total (g)            | 9.2 $\pm$ 0.6   | 13.9 $\pm$ 0.5               | 11.2 $\pm$ 0.9  | 10.2 $\pm$ 0.6  | 9.1 $\pm$ 1.0   | 12.0 $\pm$ 0.7              | 10.5 $\pm$ 1.4  |
| DM of roots (g)                   | 6.3 $\pm$ 1.0   | 8.9 $\pm$ 1.0                | 6.2 $\pm$ 1.0   | 4.3 $\pm$ 0.6   | 3.7 $\pm$ 0.4   | 8.1 $\pm$ 0.9               | 2.6 $\pm$ 0.3   |

**Table S4.** Effect of NaCl and KCl treatment on morphological parameters of *Cochlearia officinalis* plants. Data are means from 5 replicates  $\pm$  SE.

| Parameter               | Control         | NaCl (mmol L <sup>-1</sup> ) |                 |                 |                 | KCl (mmol L <sup>-1</sup> ) |                 |                 |                 |
|-------------------------|-----------------|------------------------------|-----------------|-----------------|-----------------|-----------------------------|-----------------|-----------------|-----------------|
|                         |                 | 44                           | 87              | 217             | 434             | 44                          | 87              | 217             | 434             |
| Leaves ( <i>n</i> )     | 112 $\pm$ 15    | 114 $\pm$ 27                 | 108 $\pm$ 9     | 63 $\pm$ 8      | 45 $\pm$ 11     | 110 $\pm$ 9                 | 127 $\pm$ 12    | 76 $\pm$ 13     | 52 $\pm$ 4      |
| DM of leaf petioles (g) | 3.8 $\pm$ 0.6   | 3.4 $\pm$ 0.4                | 2.6 $\pm$ 0.1   | 1.7 $\pm$ 0.1   | 1.1 $\pm$ 0.1   | 3.3 $\pm$ 0.1               | 3.0 $\pm$ 0.2   | 1.5 $\pm$ 0.2   | 1.0 $\pm$ 0.1   |
| DM of leaf blades (g)   | 11.5 $\pm$ 1.0  | 15.2 $\pm$ 1.1               | 12.1 $\pm$ 0.8  | 7.7 $\pm$ 0.9   | 5.7 $\pm$ 0.3   | 13.5 $\pm$ 0.1              | 14.5 $\pm$ 0.9  | 7.6 $\pm$ 0.7   | 5.1 $\pm$ 0.6   |
| DM of leaves (g)        | 15.3 $\pm$ 1.2  | 18.7 $\pm$ 1.0               | 14.7 $\pm$ 0.8  | 9.4 $\pm$ 1.0   | 6.8 $\pm$ 0.4   | 16.8 $\pm$ 0.1              | 17.5 $\pm$ 0.9  | 9.1 $\pm$ 0.8   | 6.1 $\pm$ 0.7   |
| DM of roots (g)         | 2.58 $\pm$ 0.49 | 1.36 $\pm$ 0.26              | 1.79 $\pm$ 0.32 | 0.97 $\pm$ 0.10 | 0.49 $\pm$ 0.03 | 2.29 $\pm$ 0.36             | 1.54 $\pm$ 0.14 | 0.82 $\pm$ 0.09 | 0.20 $\pm$ 0.05 |



**Table S5.** Effect of NaCl and KCl treatment on morphological parameters of *Mentha aquatica* plants. Data are means from 3 replicates  $\pm$  SE, each with 3 plants.

| Parameter                  | Control         | NaCl (mmol L <sup>-1</sup> ) |                 |                 |                 | KCl (mmol L <sup>-1</sup> ) |                 |                 |                 |
|----------------------------|-----------------|------------------------------|-----------------|-----------------|-----------------|-----------------------------|-----------------|-----------------|-----------------|
|                            |                 | 25                           | 50              | 100             | 200             | 25                          | 50              | 100             | 200             |
| Leaves ( <i>n</i> )        | 160 $\pm$ 16    | 79 $\pm$ 24                  | 31 $\pm$ 6      | 16 $\pm$ 3      | 13 $\pm$ 2      | 91 $\pm$ 18                 | 76 $\pm$ 8      | 52 $\pm$ 09     | 25 $\pm$ 3      |
| Total length of stems (cm) | 84 $\pm$ 6      | 70 $\pm$ 11                  | 37 $\pm$ 2      | 36 $\pm$ 6      | 30 $\pm$ 4      | 51 $\pm$ 11                 | 55 $\pm$ 4      | 45 $\pm$ 6      | 43 $\pm$ 7      |
| DM of stems (g)            | 0.80 $\pm$ 0.12 | 0.49 $\pm$ 0.03              | 0.43 $\pm$ 0.15 | 0.34 $\pm$ 0.09 | 0.29 $\pm$ 0.04 | 0.41 $\pm$ 0.18             | 0.64 $\pm$ 0.13 | 0.51 $\pm$ 0.16 | 0.42 $\pm$ 0.08 |
| DM of leaves (g)           | 0.90 $\pm$ 0.14 | 0.73 $\pm$ 0.10              | 0.25 $\pm$ 0.02 | 0.18 $\pm$ 0.03 | 0.21 $\pm$ 0.05 | 0.52 $\pm$ 0.02             | 0.44 $\pm$ 0.06 | 0.36 $\pm$ 0.05 | 0.19 $\pm$ 0.05 |
| DM of roots (g)            | 0.12 $\pm$ 0.02 | 0.08 $\pm$ 0.01              | 0.10 $\pm$ 0.03 | 0.05 $\pm$ 0.02 | 0.08 $\pm$ 0.03 | 0.09 $\pm$ 0.01             | 0.08 $\pm$ 0.01 | 0.08 $\pm$ 0.01 | 0.05 $\pm$ 0.01 |

**Table S6.** Effect of NaCl and KCl treatment on Na<sup>+</sup> and K<sup>+</sup> concentration and electrical conductivity (EC) in different parts of *Beta vulgaris* subsp. *vulgaris* var. *cicla* plants. Data are means from 5 replicates  $\pm$  SE.

| Parameter                                   | Plant part              | Control        | NaCl (mmol L <sup>-1</sup> ) |                |                 |                  | KCl (mmol L <sup>-1</sup> ) |                 |                 |                     |
|---------------------------------------------|-------------------------|----------------|------------------------------|----------------|-----------------|------------------|-----------------------------|-----------------|-----------------|---------------------|
|                                             |                         |                | 44                           | 87             | 217             | 434              | 44                          | 87              | 217             | 434                 |
| Na <sup>+</sup> (g kg <sup>-1</sup> DM)     | Senescent leaf petioles | 7.6 $\pm$ 1.0  | 48.4 $\pm$ 7.5               | 52.0 $\pm$ 3.9 | 48.0 $\pm$ 12.3 | 85.0 $\pm$ 14.4  | 4.2 $\pm$ 0.3               | 3.1 $\pm$ 1.4   | 1.5 $\pm$ 0.2   | 1.6 $\pm$ 0.1       |
|                                             | Senescent leaf blades   | 11.6 $\pm$ 1.8 | 60.6 $\pm$ 7.7               | 80.0 $\pm$ 3.9 | 73.1 $\pm$ 16.7 | 108.9 $\pm$ 17.3 | 8.8 $\pm$ 1.9               | 5.7 $\pm$ 0.9   | 4.5 $\pm$ 0.2   | 4.7 $\pm$ 0.3       |
|                                             | Old leaf petioles       | 6.2 $\pm$ 0.7  | 41.1 $\pm$ 7.6               | 46.6 $\pm$ 4.1 | 68.1 $\pm$ 5.1  | 83.3 $\pm$ 4.4   | 3.0 $\pm$ 0.7               | 2.1 $\pm$ 0.2   | 1.9 $\pm$ 0.2   | 1.7 $\pm$ 0.1       |
|                                             | Old leaf blades         | 11.1 $\pm$ 2.8 | 58.3 $\pm$ 2.6               | 69.5 $\pm$ 2.4 | 95.0 $\pm$ 9.8  | 119.0 $\pm$ 4.7  | 8.3 $\pm$ 0.9               | 6.3 $\pm$ 0.2   | 5.3 $\pm$ 1.1   | 4.9 $\pm$ 0.3       |
|                                             | Middle leaf petioles    | 4.6 $\pm$ 0.6  | 35.1 $\pm$ 5.0               | 30.7 $\pm$ 4.0 | 50.5 $\pm$ 2.5  | 73.8 $\pm$ 3.1   | 2.7 $\pm$ 0.3               | 1.4 $\pm$ 0.1   | 1.1 $\pm$ 0.1   | 1.0 $\pm$ 0.1       |
|                                             | Middle leaf blades      | 12.3 $\pm$ 2.3 | 37.9 $\pm$ 11.3              | 43.7 $\pm$ 3.7 | 68.3 $\pm$ 7.3  | 86.2 $\pm$ 3.9   | 7.6 $\pm$ 1.4               | 4.5 $\pm$ 0.1   | 3.4 $\pm$ 0.5   | 3.0 $\pm$ 0.1       |
|                                             | Young leaf petioles     | 2.8 $\pm$ 0.4  | 17.6 $\pm$ 2.9               | 22.7 $\pm$ 2.8 | 33.8 $\pm$ 1.7  | 48.3 $\pm$ 1.6   | 2.6 $\pm$ 0.1               | 1.7 $\pm$ 0.1   | 1.4 $\pm$ 0.1   | 1.5 $\pm$ 0.1       |
|                                             | Young leaf blades       | 9.3 $\pm$ 1.1  | 31.4 $\pm$ 2.5               | 32.7 $\pm$ 3.5 | 43.2 $\pm$ 4.1  | 60.6 $\pm$ 2.4   | 8.1 $\pm$ 1.2               | 4.9 $\pm$ 0.4   | 3.9 $\pm$ 0.4   | 3.8 $\pm$ 0.3       |
|                                             | Fine roots              | 3.5 $\pm$ 0.2  | 12.7 $\pm$ 0.7               | 16.3 $\pm$ 1.3 | 13.8 $\pm$ 1.6  | 16.5 $\pm$ 1.9   | 2.02 $\pm$ 0.38             | 1.23 $\pm$ 0.18 | 0.83 $\pm$ 0.04 | 0.78 $\pm$ 0.04     |
|                                             | Middle roots            | 2.2 $\pm$ 0.5  | 11.1 $\pm$ 1.0               | 12.6 $\pm$ 2.8 | 12.7 $\pm$ 3.0  | 19.1 $\pm$ 0.7   | 1.12 $\pm$ 0.02             | 0.97 $\pm$ 0.04 | 0.80 $\pm$ 0.06 | 0.75 $\pm$ 0.00     |
|                                             | Tap root                | 1.4 $\pm$ 0.3  | 7.6 $\pm$ 1.0                | 11.2 $\pm$ 0.4 | 7.9 $\pm$ 1.7   | 9.7 $\pm$ 1.8    | 0.82 $\pm$ 0.14             | 0.65 $\pm$ 0.03 | 0.67 $\pm$ 0.04 | 0.75 $\pm$ 0.06     |
|                                             |                         |                |                              |                |                 |                  |                             |                 |                 |                     |
| K <sup>+</sup> (g kg <sup>-1</sup> DM)      | Senescent leaf petioles | 49 $\pm$ 8     | 49 $\pm$ 12                  | 37 $\pm$ 12    | 38 $\pm$ 10     | 35 $\pm$ 3       | 147 $\pm$ 6                 | 158 $\pm$ 32    | 156 $\pm$ 15    | 137 $\pm$ 4         |
|                                             | Senescent leaf blades   | 52 $\pm$ 10    | 32 $\pm$ 5                   | 24 $\pm$ 9     | 30 $\pm$ 2      | 29 $\pm$ 1       | 144 $\pm$ 15                | 152 $\pm$ 14    | 177 $\pm$ 19    | 173 $\pm$ 7         |
|                                             | Old leaf petioles       | 14 $\pm$ 5     | 18 $\pm$ 8                   | 21 $\pm$ 3     | 19 $\pm$ 9      | 20 $\pm$ 5       | 106 $\pm$ 22                | 144 $\pm$ 23    | 178 $\pm$ 5     | 195 $\pm$ 8         |
|                                             | Old leaf blades         | 36 $\pm$ 2     | 28 $\pm$ 1                   | 24 $\pm$ 6     | 25 $\pm$ 2      | 19 $\pm$ 2       | 116 $\pm$ 8                 | 140 $\pm$ 5     | 201 $\pm$ 7     | 173 $\pm$ 3         |
|                                             | Middle leaf petioles    | 13 $\pm$ 3     | 14 $\pm$ 6                   | 20 $\pm$ 3     | 23 $\pm$ 9      | 26 $\pm$ 5       | 65 $\pm$ 15                 | 104 $\pm$ 10    | 128 $\pm$ 10    | 175 $\pm$ 12        |
|                                             | Middle leaf blades      | 31 $\pm$ 2     | 20 $\pm$ 1                   | 24 $\pm$ 3     | 26 $\pm$ 3      | 18 $\pm$ 1       | 76 $\pm$ 2                  | 106 $\pm$ 4     | 154 $\pm$ 23    | 245 $\pm$ 5         |
|                                             | Young leaf petioles     | 21 $\pm$ 1     | 24 $\pm$ 5                   | 30 $\pm$ 5     | 34 $\pm$ 7      | 35 $\pm$ 2       | 60 $\pm$ 13                 | 93 $\pm$ 3      | 114 $\pm$ 15    | 165 $\pm$ 10        |
|                                             | Young leaf blades       | 32 $\pm$ 1     | 28 $\pm$ 1                   | 29 $\pm$ 2     | 29 $\pm$ 1      | 26 $\pm$ 1       | 55 $\pm$ 5                  | 81 $\pm$ 4      | 108 $\pm$ 13    | 196 $\pm$ 10        |
|                                             | Fine roots              | 13.3 $\pm$ 0.7 | 8.8 $\pm$ 1.0                | 9.7 $\pm$ 0.3  | 9.4 $\pm$ 2.8   | 10.5 $\pm$ 0.8   | 32 $\pm$ 1                  | 38 $\pm$ 2      | 37 $\pm$ 2      | 35 $\pm$ 3          |
|                                             | Middle roots            | 16.1 $\pm$ 1.9 | 10.8 $\pm$ 1.2               | 9.2 $\pm$ 2.0  | 9.1 $\pm$ 2.8   | 10.5 $\pm$ 3.5   | 34 $\pm$ 4                  | 36 $\pm$ 2      | 42 $\pm$ 4      | 49 $\pm$ 3          |
|                                             | Tap root                | 10.7 $\pm$ 1.7 | 5.7 $\pm$ 0.2                | 5.3 $\pm$ 0.4  | 7.4 $\pm$ 0.9   | 6.3 $\pm$ 0.9    | 19 $\pm$ 4                  | 24 $\pm$ 4      | 21 $\pm$ 5      | 45 $\pm$ 7          |
|                                             |                         |                |                              |                |                 |                  |                             |                 |                 |                     |
| EC (mS m <sup>-1</sup> kg <sup>-1</sup> DM) | Senescent leaf petioles | 196 $\pm$ 32   | 380 $\pm$ 13                 | 348 $\pm$ 20   | 323 $\pm$ 53    | 418 $\pm$ 39     | 373 $\pm$ 18                | 408 $\pm$ 45    | 423 $\pm$ 34    | 392 $\pm$ 9         |
|                                             | Senescent leaf blades   | 240 $\pm$ 32   | 375 $\pm$ 41                 | 403 $\pm$ 48   | 387 $\pm$ 63    | 455 $\pm$ 41     | 388 $\pm$ 41                | 413 $\pm$ 41    | 487 $\pm$ 42    | 492 $\pm$ 15        |
|                                             | Old leaf petioles       | 90 $\pm$ 17    | 243 $\pm$ 38                 | 277 $\pm$ 23   | 368 $\pm$ 43    | 423 $\pm$ 4      | 320 $\pm$ 54                | 387 $\pm$ 57    | 467 $\pm$ 6     | 497 $\pm$ 14        |
|                                             | Middle leaf petioles    | 69 $\pm$ 6     | 193 $\pm$ 33                 | 218 $\pm$ 26   | 300 $\pm$ 22    | 390 $\pm$ 10     | 212 $\pm$ 42                | 323 $\pm$ 26    | 375 $\pm$ 28    | 482 $\pm$ 31        |
|                                             | Middle leaf blades      | 158 $\pm$ 11   | 263 $\pm$ 4                  | 285 $\pm$ 19   | 378 $\pm$ 27    | 410 $\pm$ 18     | 268 $\pm$ 12                | 352 $\pm$ 17    | 443 $\pm$ 46    | 637 $\pm$ 13        |
|                                             | Young leaf petioles     | 76 $\pm$ 3     | 137 $\pm$ 22                 | 172 $\pm$ 21   | 253 $\pm$ 13    | 312 $\pm$ 2      | 193 $\pm$ 38                | 275 $\pm$ 3     | 305 $\pm$ 32    | 403 $\pm$ 21        |
|                                             | Young leaf blades       | 135 $\pm$ 5    | 197 $\pm$ 12                 | 202 $\pm$ 19   | 278 $\pm$ 16    | 325 $\pm$ 10     | 198 $\pm$ 18                | 250 $\pm$ 9     | 290 $\pm$ 27    | 465 $\pm$ 15        |
|                                             | Fine roots              | 66 $\pm$ 2     | 93 $\pm$ 2                   | 108 $\pm$ 3    | 101 $\pm$ 5     | 115 $\pm$ 8      | 112 $\pm$ 3                 | 132 $\pm$ 7     | 125 $\pm$ 8     | 117 $\pm$ 6         |
|                                             | Middle roots            | 68 $\pm$ 9     | 90 $\pm$ 7                   | 81 $\pm$ 17    | 92 $\pm$ 1      | 117 $\pm$ 13     | 111 $\pm$ 12                | 115 $\pm$ 5     | 133 $\pm$ 10    | 153 $\pm$ 350 $\pm$ |
|                                             | Tap root                | 50 $\pm$ 7     | 64 $\pm$ 5                   | 78 $\pm$ 3     | 74 $\pm$ 3      | 74 $\pm$ 4       | 67 $\pm$ 13                 | 86 $\pm$ 8      | 77 $\pm$ 13     | 148 $\pm$ 20        |

**Table S7.** Effect of NaCl and KCl treatment on Na<sup>+</sup> and K<sup>+</sup> concentration and electrical conductivity (EC) in different parts of *Beta vulgaris* subsp. *maritima* plants. Data are means from 5 replicates  $\pm$  SE.

| Parameter                                   | Plant part              | Control        | NaCl (mmol L <sup>-1</sup> ) |                |                 |                 | KCl (mmol L <sup>-1</sup> ) |                 |
|---------------------------------------------|-------------------------|----------------|------------------------------|----------------|-----------------|-----------------|-----------------------------|-----------------|
|                                             |                         |                | 44                           | 87             | 217             | 434             | 44                          | 434             |
| Na <sup>+</sup> (g kg <sup>-1</sup> DM)     | Senescent leaf petioles | 6.0 $\pm$ 0.9  | 47.7 $\pm$ 4.9               | 54.9 $\pm$ 3.9 | 62.4 $\pm$ 9.9  | 85.4 $\pm$ 10.1 | 1.98 $\pm$ 0.30             | 1.89 $\pm$ 0.33 |
|                                             | Senescent leaf blades   | 8.5 $\pm$ 0.6  | 62.3 $\pm$ 7.9               | 58.1 $\pm$ 5.9 | 90.0 $\pm$ 10.5 | 93.0 $\pm$ 16.4 | 4.55 $\pm$ 0.25             | 3.74 $\pm$ 0.70 |
|                                             | Old leaf petioles       | 6.9 $\pm$ 2.0  | 40.5 $\pm$ 3.5               | 52.5 $\pm$ 1.4 | 61.0 $\pm$ 2.5  | 72.7 $\pm$ 7.8  | 1.63 $\pm$ 0.15             | 1.46 $\pm$ 0.17 |
|                                             | Old leaf blades         | 8.0 $\pm$ 1.3  | 53.1 $\pm$ 8.3               | 54.6 $\pm$ 5.6 | 90.0 $\pm$ 13.9 | 90.0 $\pm$ 13.1 | 4.38 $\pm$ 0.58             | 3.26 $\pm$ 0.52 |
|                                             | Middle leaf petioles    | 6.0 $\pm$ 1.9  | 24.8 $\pm$ 3.0               | 41.4 $\pm$ 0.7 | 51.8 $\pm$ 2.0  | 57.9 $\pm$ 8.7  | 1.55 $\pm$ 0.28             | 1.45 $\pm$ 0.15 |
|                                             | Middle leaf blades      | 8.8 $\pm$ 1.6  | 30.0 $\pm$ 3.7               | 44.1 $\pm$ 6.3 | 59.8 $\pm$ 4.3  | 63.4 $\pm$ 10.3 | 4.52 $\pm$ 0.78             | 2.41 $\pm$ 0.40 |
|                                             | Young leaf petioles     | 4.7 $\pm$ 0.9  | 18.9 $\pm$ 0.6               | 24.3 $\pm$ 2.7 | 36.2 $\pm$ 4.5  | 43.8 $\pm$ 5.7  | 1.32 $\pm$ 0.22             | 2.03 $\pm$ 0.66 |
|                                             | Young leaf blades       | 6.3 $\pm$ 0.6  | 18.2 $\pm$ 1.0               | 22.8 $\pm$ 2.5 | 35.3 $\pm$ 5.0  | 40.5 $\pm$ 5.6  | 3.48 $\pm$ 0.57             | 1.85 $\pm$ 0.33 |
|                                             | Small leaf petioles     | 9.2 $\pm$ 2.6  | 35.1 $\pm$ 3.4               | 49.8 $\pm$ 3.7 | 55.4 $\pm$ 4.7  | 64.5 $\pm$ 8.8  | 1.85 $\pm$ 0.30             | 1.59 $\pm$ 0.07 |
|                                             | Small leaf blades       | 9.0 $\pm$ 1.3  | 43.6 $\pm$ 2.0               | 60.1 $\pm$ 8.5 | 60.6 $\pm$ 5.8  | 70.0 $\pm$ 8.8  | 4.62 $\pm$ 0.61             | 2.65 $\pm$ 0.41 |
|                                             | Fine roots              | 1.5 $\pm$ 0.4  | 5.6 $\pm$ 0.9                | 10.2 $\pm$ 0.6 | 9.0 $\pm$ 0.5   | 9.5 $\pm$ 2.0   | 0.98 $\pm$ 0.20             | 0.73 $\pm$ 0.04 |
|                                             | Middle roots            | 1.6 $\pm$ 0.4  | 3.7 $\pm$ 0.9                | 6.5 $\pm$ 0.6  | 8.8 $\pm$ 2.8   | 13.0 $\pm$ 3.8  | 0.60 $\pm$ 0.08             | 0.92 $\pm$ 0.09 |
|                                             | Tap root                | 1.2 $\pm$ 0.2  | 2.6 $\pm$ 0.4                | 4.6 $\pm$ 0.4  | 4.1 $\pm$ 0.3   | 9.8 $\pm$ 2.3   | 0.47 $\pm$ 0.04             | 0.83 $\pm$ 0.12 |
| K <sup>+</sup> (g kg <sup>-1</sup> DM)      | Senescent leaf petioles | 22.0 $\pm$ 3.8 | 29.2 $\pm$ 12.5              | 12.0 $\pm$ 2.1 | 19.1 $\pm$ 3/0  | 16.9 $\pm$ 4.7  | 66 $\pm$ 11                 | 139 $\pm$ 23    |
|                                             | Senescent leaf blades   | 26.5 $\pm$ 5.6 | 22.6 $\pm$ 10.7              | 11.9 $\pm$ 1.9 | 17.2 $\pm$ 4.1  | 11.0 $\pm$ 2.6  | 75 $\pm$ 10                 | 155 $\pm$ 24    |
|                                             | Old leaf petioles       | 8.3 $\pm$ 1.9  | 14.2 $\pm$ 4.9               | 11.6 $\pm$ 2.7 | 23.4 $\pm$ 5.2  | 11.9 $\pm$ 2.6  | 68 $\pm$ 10                 | 158 $\pm$ 18    |
|                                             | Old leaf blades         | 13.7 $\pm$ 2.7 | 13.7 $\pm$ 4.9               | 11.4 $\pm$ 2.3 | 17.5 $\pm$ 2.1  | 10.5 $\pm$ 1.5  | 72 $\pm$ 6                  | 198 $\pm$ 19    |
|                                             | Middle leaf petioles    | 11.8 $\pm$ 1.0 | 14.9 $\pm$ 3.8               | 11.4 $\pm$ 1.1 | 26.4 $\pm$ 3.9  | 11.3 $\pm$ 2.2  | 53 $\pm$ 10                 | 150 $\pm$ 18    |
|                                             | Middle leaf blades      | 14.5 $\pm$ 1.0 | 15.4 $\pm$ 4.4               | 11.1 $\pm$ 1.1 | 24.6 $\pm$ 3.5  | 12.0 $\pm$ 1.3  | 53 $\pm$ 7                  | 168 $\pm$ 25    |
|                                             | Young leaf petioles     | 16.8 $\pm$ 2.2 | 24.7 $\pm$ 5.1               | 17.0 $\pm$ 1.1 | 32.9 $\pm$ 6.4  | 14.2 $\pm$ 1.7  | 39 $\pm$ 6                  | 115 $\pm$ 13    |
|                                             | Young leaf blades       | 16.2 $\pm$ 1.2 | 21.7 $\pm$ 4.7               | 14.9 $\pm$ 1.2 | 28.9 $\pm$ 5.0  | 15.0 $\pm$ 1.4  | 37 $\pm$ 5                  | 115 $\pm$ 9     |
|                                             | Small leaf petioles     | 16.0 $\pm$ 2.3 | 16.7 $\pm$ 4.2               | 11.4 $\pm$ 0.7 | 33.9 $\pm$ 3.4  | 13.6 $\pm$ 1.6  | 68 $\pm$ 6                  | 148 $\pm$ 8     |
|                                             | Small leaf blades       | 12.8 $\pm$ 1.4 | 15.6 $\pm$ 3.3               | 10.1 $\pm$ 0.6 | 28.9 $\pm$ 3.8  | 11.5 $\pm$ 1.4  | 68 $\pm$ 8                  | 181 $\pm$ 20    |
|                                             | Fine roots              | 21.8 $\pm$ 5.6 | 13.8 $\pm$ 2.9               | 12.6 $\pm$ 2.8 | 2.4 $\pm$ 0.5   | 2.4 $\pm$ 0.3   | 27 $\pm$ 9                  | 51 $\pm$ 11     |
|                                             | Middle roots            | 17.8 $\pm$ 1.0 | 25.8 $\pm$ 11.8              | 14.7 $\pm$ 2.5 | 5.1 $\pm$ 0.7   | 5.0 $\pm$ 1.0   | 24 $\pm$ 8                  | 89 $\pm$ 22     |
|                                             | Tap root                | 12.3 $\pm$ 1.5 | 17.4 $\pm$ 6.9               | 11.6 $\pm$ 0.5 | 4.1 $\pm$ 0.7   | 5.0 $\pm$ 0.8   | 14 $\pm$ 5                  | 89 $\pm$ 24     |
| EC (mS m <sup>-1</sup> kg <sup>-1</sup> DM) | Senescent leaf petioles | 104 $\pm$ 17   | 279 $\pm$ 21                 | 299 $\pm$ 26   | 276 $\pm$ 17    | 424 $\pm$ 48    | 282 $\pm$ 48                | 488 $\pm$ 46    |
|                                             | Senescent leaf blades   | 114 $\pm$ 17   | 322 $\pm$ 19                 | 308 $\pm$ 21   | 382 $\pm$ 22    | 440 $\pm$ 25    | 328 $\pm$ 33                | 553 $\pm$ 61    |
|                                             | Old leaf petioles       | 68 $\pm$ 11    | 224 $\pm$ 16                 | 291 $\pm$ 7    | 274 $\pm$ 31    | 375 $\pm$ 20    | 282 $\pm$ 34                | 534 $\pm$ 36    |
|                                             | Middle leaf petioles    | 72 $\pm$ 7     | 165 $\pm$ 16                 | 251 $\pm$ 8    | 255 $\pm$ 15    | 318 $\pm$ 29    | 212 $\pm$ 35                | 444 $\pm$ 46    |
|                                             | Middle leaf blades      | 98 $\pm$ 11    | 189 $\pm$ 12                 | 255 $\pm$ 22   | 268 $\pm$ 15    | 339 $\pm$ 22    | 228 $\pm$ 22                | 530 $\pm$ 51    |
|                                             | Young leaf petioles     | 84 $\pm$ 11    | 163 $\pm$ 6                  | 203 $\pm$ 10   | 223 $\pm$ 7     | 277 $\pm$ 18    | 155 $\pm$ 17                | 393 $\pm$ 34    |
|                                             | Young leaf blades       | 93 $\pm$ 6     | 155 $\pm$ 7                  | 190 $\pm$ 5    | 211 $\pm$ 6     | 265 $\pm$ 12    | 160 $\pm$ 13                | 388 $\pm$ 22    |
|                                             | Small leaf petioles     | 101 $\pm$ 15   | 204 $\pm$ 14                 | 273 $\pm$ 14   | 267 $\pm$ 19    | 330 $\pm$ 22    | 272 $\pm$ 22                | 511 $\pm$ 38    |
|                                             | Small leaf blades       | 90 $\pm$ 10    | 238 $\pm$ 14                 | 311 $\pm$ 29   | 277 $\pm$ 16    | 354 $\pm$ 25    | 282 $\pm$ 14                | 571 $\pm$ 28    |
|                                             | Fine roots              | 38 $\pm$ 9     | 42 $\pm$ 4                   | 63 $\pm$ 2     | 67 $\pm$ 3      | 69 $\pm$ 9      | 78 $\pm$ 8                  | 120 $\pm$ 8     |



|  |              |            |            |            |             |             |            |              |
|--|--------------|------------|------------|------------|-------------|-------------|------------|--------------|
|  | Middle roots | $32 \pm 1$ | $38 \pm 4$ | $53 \pm 5$ | $97 \pm 19$ | $91 \pm 16$ | $62 \pm 6$ | $203 \pm 18$ |
|  | Tap root     | $21 \pm 1$ | $29 \pm 3$ | $41 \pm 3$ | $50 \pm 5$  | $81 \pm 12$ | $38 \pm 5$ | $200 \pm 23$ |

**Table S8.** Effect of NaCl and KCl treatment on Na<sup>+</sup> and K<sup>+</sup> concentration and electrical conductivity (EC) in different parts of *Cochlearia officinalis* plants. Data are means from 5 replicates  $\pm$  SE.

| Parameter                                   | Plant part    | Control        | NaCl (mmol L <sup>-1</sup> ) |                |                |                | KCl (mmol L <sup>-1</sup> ) |                 |                  |                  |
|---------------------------------------------|---------------|----------------|------------------------------|----------------|----------------|----------------|-----------------------------|-----------------|------------------|------------------|
|                                             |               |                | 44                           | 87             | 217            | 434            | 44                          | 87              | 217              | 434              |
| Na <sup>+</sup> (g kg <sup>-1</sup> DM)     | Leaf petioles | 2.7 $\pm$ 0.4  | 24.5 $\pm$ 1.8               | 29.6 $\pm$ 3.8 | 38.5 $\pm$ 7.1 | 43.7 $\pm$ 5.8 | 1.14 $\pm$ 0.03             | 1.08 $\pm$ 0.09 | 1.43 $\pm$ 0.13  | 1.95 $\pm$ 0.15  |
|                                             | Leaf blades   | 2.9 $\pm$ 0.5  | 24.9 $\pm$ 1.8               | 35.8 $\pm$ 8.1 | 49.5 $\pm$ 4.1 | 52.6 $\pm$ 5.1 | 2.01 $\pm$ 0.06             | 1.81 $\pm$ 0.37 | 2.07 $\pm$ 0.16  | 2.36 $\pm$ 0.27  |
|                                             | Roots         | 3.8 $\pm$ 1.6  | 10.8 $\pm$ 1.9               | 12.0 $\pm$ 0.7 | 8.5 $\pm$ 1.2  | 9.5 $\pm$ 1.8  | 0.58 $\pm$ 0.04             | 0.77 $\pm$ 0.04 | 0.68 $\pm$ 0.03  | 0.99 $\pm$ 0.09  |
| K <sup>+</sup> (g kg <sup>-1</sup> DM)      | Leaf petioles | 13.2 $\pm$ 4.8 | 17.5 $\pm$ 2.3               | 27.1 $\pm$ 2.3 | 26.1 $\pm$ 5.2 | 33.0 $\pm$ 6.7 | 75.8 $\pm$ 3.0              | 80.8 $\pm$ 3.0  | 140.0 $\pm$ 7.6  | 215.8 $\pm$ 8.5  |
|                                             | Leaf blades   | 8.0 $\pm$ 2.4  | 12.2 $\pm$ 3.6               | 8.7 $\pm$ 0.4  | 7.7 $\pm$ 1.0  | 12.2 $\pm$ 1.6 | 54.2 $\pm$ 3.0              | 50.8 $\pm$ 4.8  | 100.0 $\pm$ 15.1 | 172.3 $\pm$ 26.2 |
|                                             | Roots         | 6.4 $\pm$ 1.8  | 5.6 $\pm$ 1.2                | 6.8 $\pm$ 0.7  | 12.0 $\pm$ 2.3 | 9.6 $\pm$ 1.4  | 18.3 $\pm$ 2.2              | 31.3 $\pm$ 1.6  | 31.4 $\pm$ 2.2   | 48.9 $\pm$ 11.9  |
| EC (mS m <sup>-1</sup> kg <sup>-1</sup> DM) | Leaf petioles | 97 $\pm$ 19    | 172 $\pm$ 27                 | 255 $\pm$ 15   | 280 $\pm$ 38   | 298 $\pm$ 36   | 238 $\pm$ 11                | 261 $\pm$ 6     | 387 $\pm$ 17     | 572 $\pm$ 25     |
|                                             | Roots         | 52 $\pm$ 6     | 85 $\pm$ 10                  | 90 $\pm$ 3     | 92 $\pm$ 10    | 105 $\pm$ 15   | 75 $\pm$ 9                  | 115 $\pm$ 5     | 110 $\pm$ 9      | 165 $\pm$ 30     |

**Table S9.** Effect of NaCl and KCl treatment on Na<sup>+</sup> and K<sup>+</sup> concentration and electrical conductivity (EC) in different parts of *Mentha aquatica* plants. Data are means from 5 replicates  $\pm$  SE.

| Parameter                                   | Plant part | Control       | NaCl (mmol L <sup>-1</sup> ) |                |                |                | KCl (mmol L <sup>-1</sup> ) |                 |                 |                 |
|---------------------------------------------|------------|---------------|------------------------------|----------------|----------------|----------------|-----------------------------|-----------------|-----------------|-----------------|
|                                             |            |               | 25                           | 50             | 100            | 200            | 25                          | 50              | 100             | 200             |
| Na <sup>+</sup> (g kg <sup>-1</sup> DM)     | Leaves     | 2.3 $\pm$ 0.1 | 21.8 $\pm$ 2.3               | 33.0 $\pm$ 0.8 | 40.5 $\pm$ 2.5 | 35.8 $\pm$ 4.2 | 0.73 $\pm$ 0.05             | 0.68 $\pm$ 0.01 | 0.96 $\pm$ 0.04 | 0.93 $\pm$ 0.07 |
|                                             | Stems      | 2.5 $\pm$ 0.2 | 14.3 $\pm$ 0.8               | 28.1 $\pm$ 2.7 | 28.9 $\pm$ 2.7 | 86.0 $\pm$ 8.5 | 0.84 $\pm$ 0.04             | 1.08 $\pm$ 0.17 | 0.99 $\pm$ 0.04 | 1.73 $\pm$ 0.02 |
|                                             | Roots      | 6.5 $\pm$ 0.5 | 13.6 $\pm$ 0.9               | 15.2 $\pm$ 1.4 | 17.5 $\pm$ 0.3 | 10.2 $\pm$ 1.0 | 1.25 $\pm$ 0.05             | 0.92 $\pm$ 0.10 | 0.78 $\pm$ 0.08 | 1.11 $\pm$ 0.05 |
| K <sup>+</sup> (g kg <sup>-1</sup> DM)      | Leaves     | 52 $\pm$ 2    | 33 $\pm$ 4                   | 15 $\pm$ 1     | 14 $\pm$ 1     | 12 $\pm$ 1     | 58 $\pm$ 3                  | 63 $\pm$ 2      | 144 $\pm$ 8     | 143 $\pm$ 14    |
|                                             | Stems      | 87 $\pm$ 2    | 61 $\pm$ 4                   | 40 $\pm$ 2     | 40 $\pm$ 3     | 30 $\pm$ 2     | 78 $\pm$ 3                  | 82 $\pm$ 9      | 88 $\pm$ 9      | 131 $\pm$ 4     |
|                                             | Roots      | 54 $\pm$ 3    | 46 $\pm$ 4                   | 30 $\pm$ 5     | 9 $\pm$ 2      | 3 $\pm$ 1      | 62 $\pm$ 2                  | 61 $\pm$ 2      | 38 $\pm$ 3      | 25 $\pm$ 4      |
| EC (mS m <sup>-1</sup> kg <sup>-1</sup> DM) | Stems      | 164 $\pm$ 2   | 167 $\pm$ 6                  | 163 $\pm$ 12   | 164 $\pm$ 12   | 328 $\pm$ 14   | 232 $\pm$ 11                | 252 $\pm$ 23    | 228 $\pm$ 27    | 378 $\pm$ 8     |
|                                             | Roots      | 80 $\pm$ 4    | 102 $\pm$ 9                  | 107 $\pm$ 13   | 86 $\pm$ 8     | 38 $\pm$ 5     | 166 $\pm$ 6                 | 187 $\pm$ 7     | 92 $\pm$ 12     | 52 $\pm$ 4      |
